# Supplementary material for: An RNA Transport System in Candida albicans Regulates Hyphal Morphology and Invasive Growth
Source: PLoS Genet. 2009 Sep 25;5(9):e1000664. doi: 10.1371/journal.pgen.1000664 (PMC2739428; doi:10.1371/journal.pgen.1000664)
Supplement: Table S3 — Fold enrichment of transcripts identified as She3-associated in microarray experiments comparing transcripts immunoprecipitated with She3 to reference samples. For each She3-associated transcript, raw enrichment values (ratio of the medians of She3-associated RNA compared to reference) are provided for each experiment (i.e., one growth condition using one reference population) where array element(s) representing that transcript passed the initial filter - spots produced interpretable hybridization in greater than 50% of arrays from that experiment and had a median percentile rank of at least 98. In cases where individual transcripts are represented by multiple array elements, the highest enrichment value from each microarray is provided. Microarrays #1–12 represent experiments with yeast cells. Microarrays #13–20, 21–28, and 29–36 represent experiments with hyphae grown in serum for, respectively, 30 minutes, one hour, or three hours. For microarrays # 1–6, 13–16, 21–24, and 29–32, the reference was RNA from a mock immunoprecipitation, as described in the Results. For microarrays # 7–12, 17–20, 25–28, and 33–36, the reference sample was total RNA from the She3-TAP strain. (0.04 MB XLS) [file pgen.1000664.s005.xls]

## Sheet: enrichment-summary
								Fold enrichment
Microarray Number:	1	2	3	4	5	6	7	8	9	10	11	12	13	14	15	16	17	18	19	20	21	22	23	24	25	26	27	28	29	30	31	32	33	34	35	36
She3-assocated transcript
orf19.3356	7.06	5.36	8.61	4.4	8.11		4.34	6.01	9.08	8.07	6.89	4.6	2.76	3.35	2.78	2.56					2.89	2.83	3.57	2.39					3.12	3.04	3.26	2.88
orf19.122	6.95	6.41	8.17	6.84	8.15	4.46	3.08	5.27	6.28	6.22	3.3	2.27									2.04	2.89	4.87	2.55					4.7	4.77	3.6	2.68	3.72	2.66	3.89	3.58
orf19.267	4.25	5.06	6.65	6.47	9.18		4.11	6.87	13.09	8.26	5.81	3.5	3.57	5.08	4.07	4.57	4.29	6.53	5.78	5.99	2.63	3.64	3.45	2.99	5.37	8.11	6.58	5.57	4	4.26	3.93	2.99	6.82	6.07	4.94	4.98
orf19.3071							5.5	5.27	5.78	5.05	2.87	4.66					3.31	3.04	3.02						3.25	4.54	4	2.63	3.26	3.07	2.71	2.14
orf19.3153	6.82	3.4	0.36	7.87	11.6	3.25	5.82	4.98	9.26	9.41	5.35	5.46	7.71	13.31	8.9	6.34	10.54	10.92	10.16	8.19	4.02	5.99	9.84	4.07	5.23	6.94	7.15	4.97	8.91	9.25	4.18	7.02	7.04	4.31	4.09	3.81
orf19.6044																					1.9	3.21	4.84	4.72	4.71	8.45	10.57	21.35					3.47	3.68	3.97	3.93
orf19.6705													5.39	8.8	7.54	5.83	3.21	4.5	3.51	3.86	3.93	4.44	4.11	2.93	3.2	4.3	3.72	2.41	3.78	3.91	3.19	2.96
orf19.3895	8.32	5.74	7.89	8.23	13.3	14.05	4.99	5.45	8.13	6.98	11.4	7.82	8.07	13.53	15.08	10.68					3.71	7.12	10.84	4.04					24.27	13.13	9.36	12.22	9.74	6.8	6.93	5.42
orf19.5537	4.15	4.45	5.66	5	5.29	3.3	4.82	5.98	10.19	7.81	5.5	4.31	3.02	5.1	3.78	3.8	3.59	6.23	3.54	4.92					3.68	5.99	4.92	3.47	2.76	3.45	3.07	2.43	4.58	4.09	2.93	2.62
orf19.207
orf19.5224	5.85	3.68	5.65	4.64	5.7	4.47	3.26	4.97	6.2	4.3	3.93	2.65	2.11	3.54	2.7	2.47					1.9	2.48	3.29	2.44
orf19.3618																	4.47	2.23	2.83		4.65	5.72	10.12	4.11	4.5	5.34	13.96	6.2
orf19.4765							4.12	3.17	3.42	3.05	3.65	4.71	2.72	3.65	3.29	3.89					3.08	4.2	5.74	3.19	2.9	3.44	4.64	3.82	4	2.91	2.44	2.53	3.38	2.66	2.75	2.21
orf19.2685	14.85		10.02	12.17	15.67	17.28	7.59	10.58	9.54		12.18	11.34	6	7.48	7.01	11.68	5.26	4.44	4.54	4.37	5.05	7.57	8.55	4.76					15.37	16.12	10.68	9.27	4.09	3.55	3.22	2.38
orf19.6948	6.86	4.73	9.01	13.1	12.62	16.41	3.63	3.78	10.28	11.66	12.79	10.21	5.86	8.02	5.6	5.2	2.54	3.3	4.35	2.59	5.75	5.01	7.11	3.56	0	0	0	0	6.07	4.25	3.92	3.43	0	0	0	0
orf19.1536							5.35	5.43	4.45		2.23	5.07	3.34	3.42	4.67	2.79	5.78	4.08	4.26	4.57	2.91	3.59	3.8	2.25					3.93	4.8	3.28	2.92	4.63	3.8	3.75	4.84
orf19.1582													5.38	4.85	5.41	6.95	5.05	5.66	3.91	4.51	4.68	4.17	4.8	4.16	2.37	4		3.46	3.01	3.67	3.19	3.04
orf19.5406	2.22	2.67	4.39	6.13	6.13	4.66	2.33	4.35	6.41	6.5	4.25	5.27	2.99	4.09	3.64	3.47	4.89	4.65	4.72	4.88	2.11	2.96	3.74	2.12	2.97	3.79	3.8	2.26
orf19.5343	9.86	8.18	10.88	12.16	19.83	9.47	8.84	8.54	19.27	12.39	10.9	10.1					3.43	3.85	2.88	2.59									6.51	6.1	4.68	4.28	8.46	7.49	5.03	5.27
orf19.2423	5.5	4.87	7.48	7.8	13.94	10.74	4.8	5.51	10.89	7.8	12.6	10.09	5.75	8.16	6.85	4.85					2.88	3.59	3.65	1.94					13.71	9.33	6.33	6.44	7.51	6.19	4.05	4.22
orf19.3315	3.11	4.03	2.35	3.59	5.64	3.47	4.08	6.38	4.92	3.66	3.16	3.79					4.21	3.93	3.13	3.43	2.2	3.53	5.35	3.04	4.66	5.33	5.67	6.1	3.29	3.13	2.79	2.49	4.98	5.15	4.02	3.31
orf19.723	3.5	4.9	8.12	7.61	9.34	6.44	2.87	3.27	4.76	4.43	4.27	4.27	3.97	6.46	4.9	4.96	2.62	3.62	3.05	3.22	2.96	3.11	3.48	2.49					4.06	3.84	2.84	2.14
orf19.2432													3.03	6.36	4.75	5.2	2.7	3.84	2.96	2.97	1.58	3.24	3.53	1.64	3.25	4		2.47	4.08	5.43		3.09	4.29	3.8	5.07	3.31
orf19.3912	3.07	3.68	6.64	3.68	3.22		3.02	4.81	5.62	4.87	3.18	1.86
orf19.6202							9.12	6.54	8.2	9.83	10.85	11.87	10.31	12.56	14	15.67	6.56	5.83	6.25	7	9.6	12.67	9.83	7.57	4.65	4.95	3.9	3.59	15.58	14.09	14.62	12.28	5.56	4.75	5.81	3.34
orf19.5585													5.01	5.38	5.67	9.42													12.78	10.42	8.77	7.18	3.89	3.86	3.9	2.81
orf19.3707	5.46	3.36	4.2	3.3	8.26	14.02											2.46	4.29	5.3	5.14					26.19	27.63	34.35	14.68
orf19.4432							4.35	3.68	4.58	4.12	3.48	5.87	2.28	3.28	4.24	2.67	6.2	5.5	3.77	4.2	2.18	2.88	3.67	1.97	3.26	4.41	4.65	3.45	3.7	3.18	2.92	2.99	4.72	3.48	3.17	3.99
orf19.2219	4.73	10.18	14.69	6.97	18.05	11.45	13.6	19.3	27.39	15.87	9.33	16.44	6.11	13.27	7.34	8.5	8.55	12.65	7.39	16.54	6.1	11.61	12.68	11.85	12.04	16.74	19.21	11.48	7.54	9.69	8.33	6.66	11.84	11.07	10.03	9.58
orf19.5710																	6.46	5.46	4.82	4.59	2.13	2.35	3.21	2.04	4.33	6.6	4.68	3.63	3.23	4.14	2.71	2.95	3.52	4.04	2.88	3.15
orf19.7228	5.05	3.47	0.39	4.39	4.49	6.93	4.83	3.46	4.34	3.77	5.85	4.78
orf19.2459							3.7	5.21	8.08	4.91	4.99	3.53	2.54	4.61	3.81	4.35	3.3	4	2.65	4.17	1.98	3.16	3.78	2.31	3.21	4.5	5.34	3.04	3.36	3.27	2.94	2.62	3.65	3.59	3.7	3.12
orf19.660								3.46	4.5	4.19	1.78						8.58	5.54	4.72	6.18	2.98	5.6	5		5.75	5.08	5.76	4.06	3.06	4.59	3.91	3.58	3.85	4.08	3.96	3.73
orf19.6660	4.74	2.17	0.89	3.66	9.04	11.5	19.25	8.99	15.45	11.11	13.96	12.6	4.86	7.89	5.51	6.69	13.86	15.51	11.25	17.98	5.89	9.88	11.39	5.62	26.19	27.63	34.35	14.68	2.79	3.02	3.22	2.75	6.93	5.33	7.04	5.8
orf19.3460	4.88	4.09	2.94	3.71	9.19	6.24	4.74	3.35	6.65	4.81	5.74	7.59									1.79	3.08	2.76	3.02	3.96	4.52	6	3.97	6.17	5.35	4.32	3.17	4.89	5.69	2.55	2.56
orf19.5282	9.28	7.9	4	4.11	15.7	14.13	8.52	6.52	7.49	5.94	6.62	6.84					5.01	5.1	3.76						3.8	5.61	9.62	10.05	3.91	4.49	2.22	1.67	13.13	9.59	5.29	4.13
orf19.2431													2.11	2.06	3.5	2.89	4	3.66	4.29	3.78										3.5	2.89	2.81	3.81	3.81	2.89	2.71
orf19.1354																					2.05	3.07	5.48	4.75	8.82	18.49	20.94	27.3					4.37	4.12	3.37	3.41
orf19.3793		3.9	7.8	8.59	9.93	7.67	3.58	5.91	12.47	9.88	5.62	5.38	5.15	9.86	6.88	8.22	10.04	11.56	9.39	17.01	2.82	5.39	4.87	2.88	8.72	10.87	13.51	6.89	4.38	4.24	4.53	3.3	7.41	6.06	9.25	6.57
orf19.3422							4.42	5	6.09	5.16	3.16	3.05									2.02	3.07	3.31	2.03
